# Supplementary material for: Spinal Nrf2 translocation may inhibit neuronal NF‐κB activation and alleviate allodynia in a rat model of bone cancer pain
Source: PubMed Central journal article supplement — J Neurochem. 2021 Jul 31;158(5):1110–30. doi: 10.1111/jnc.15468 (PMC9292887; doi:10.1111/jnc.15468), 2021-07-31
Supplement: JNC-158-1110-s001.pdf [file JNC-158-1110-s001.pdf]

# Spinal Nrf2 translocation may inhibit neuronal NF- $\kappa$ B activation and alleviate allodynia in a rat model of bone cancer pain

Jie Fu<sup>a</sup>, Chaobo Ni<sup>a</sup>, Hua-Dong Ni<sup>a</sup>, Long-Sheng Xu<sup>a</sup>, Qiu-Li He<sup>a</sup>, Huan Pan<sup>a</sup>, Dong-Dong Huang<sup>a</sup>, Yan-Bao Sun<sup>a</sup>, Ge Luo<sup>a</sup>, Ming-Juan Liu<sup>a</sup>, Ming Yao<sup>a,\*</sup>

<sup>a</sup>Department of Anesthesiology and Pain Research Center, Affiliated Hospital of Jiaxing University & The First Hospital of Jiaxing, Jiaxing, China

\* Corresponding author at: Department of Anesthesiology and Pain Medicine, Affiliated Hospital of Jiaxing University & The First Hospital of Jiaxing, Jiaxing, 314001, China

E-mail address: [jxyaoming666@163.com](mailto:jxyaoming666@163.com) (M. Yao).

ORCID ID: <https://orcid.org/0000-0002-4226-8473>

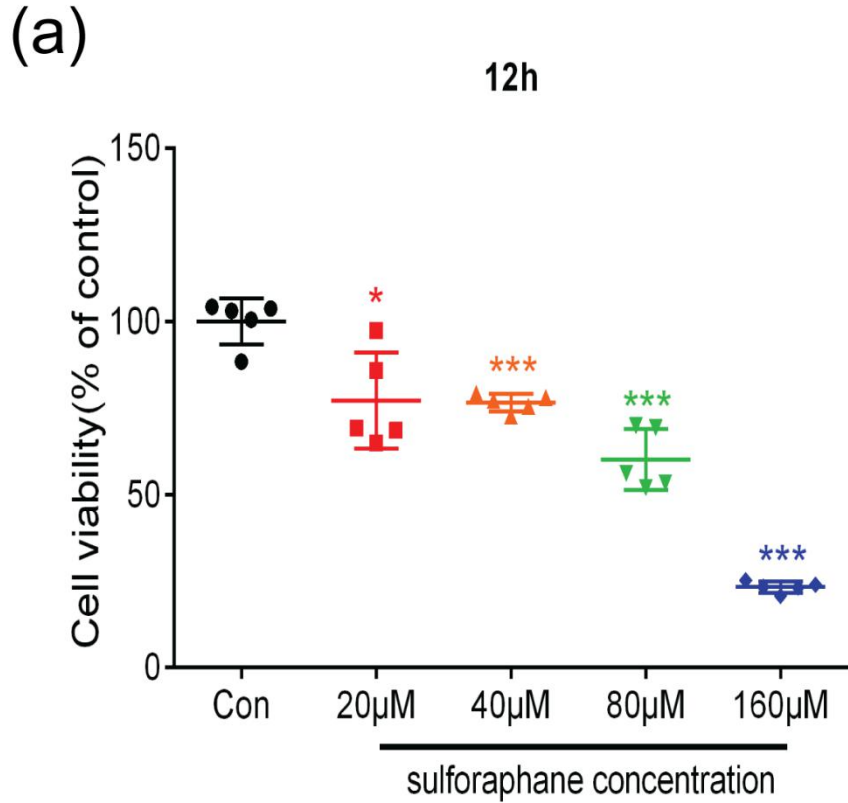

CCK8 analysis results show that sulforaphane(SFN) treatment for 12hours inhibited the proliferation of Walker256 cells in a dose-dependent manner (\* $p < 0.05$ , \*\*\* $p < 0.001$  VS control group, one-way repeated measures ANOVA)

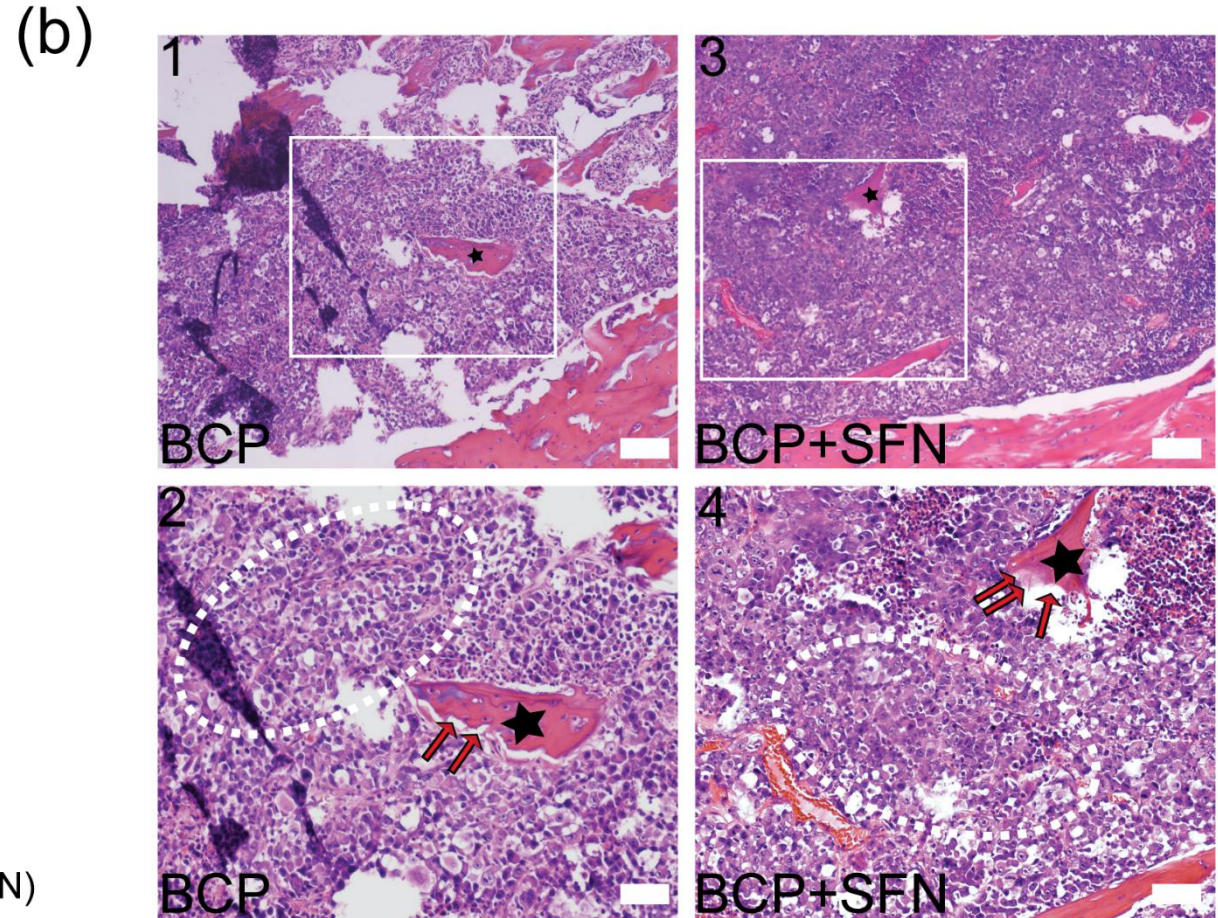

Histological analysis showed that in both sulforaphane(SFN) treatment group and bone cancer pain (BCP) group, the bone marrow cavity of rats with BCP was infiltrated by extensive cancer cells(within the dotted lines).The trabecular bone structure(asterisks)was destroyed and bone resorption pits(red arrows) appeared. The figures b(2,4)) are high-magnification image of the selected area with white frames;  $n=10$ . Scale bars: 100  $\mu$ m (top row), 50  $\mu$ m(bottom row).
